# Supplementary material for: Long-Term Impact of Dupilumab Treatment on Systemic Cytokine Profile in Atopic Dermatitis Patients: A Cross-Sectional Study
Source: Preprints.org preprint supplement (doi:10.20944/preprints202310.1584.v1), 2023-10-25

**Table S2.** Analysis of the quantity of cytokines in groups. The values provided in the table are ratios of the DUT or DT cytokine level median to HS median. Increased values are colored in red, decreased values are colored in blue.

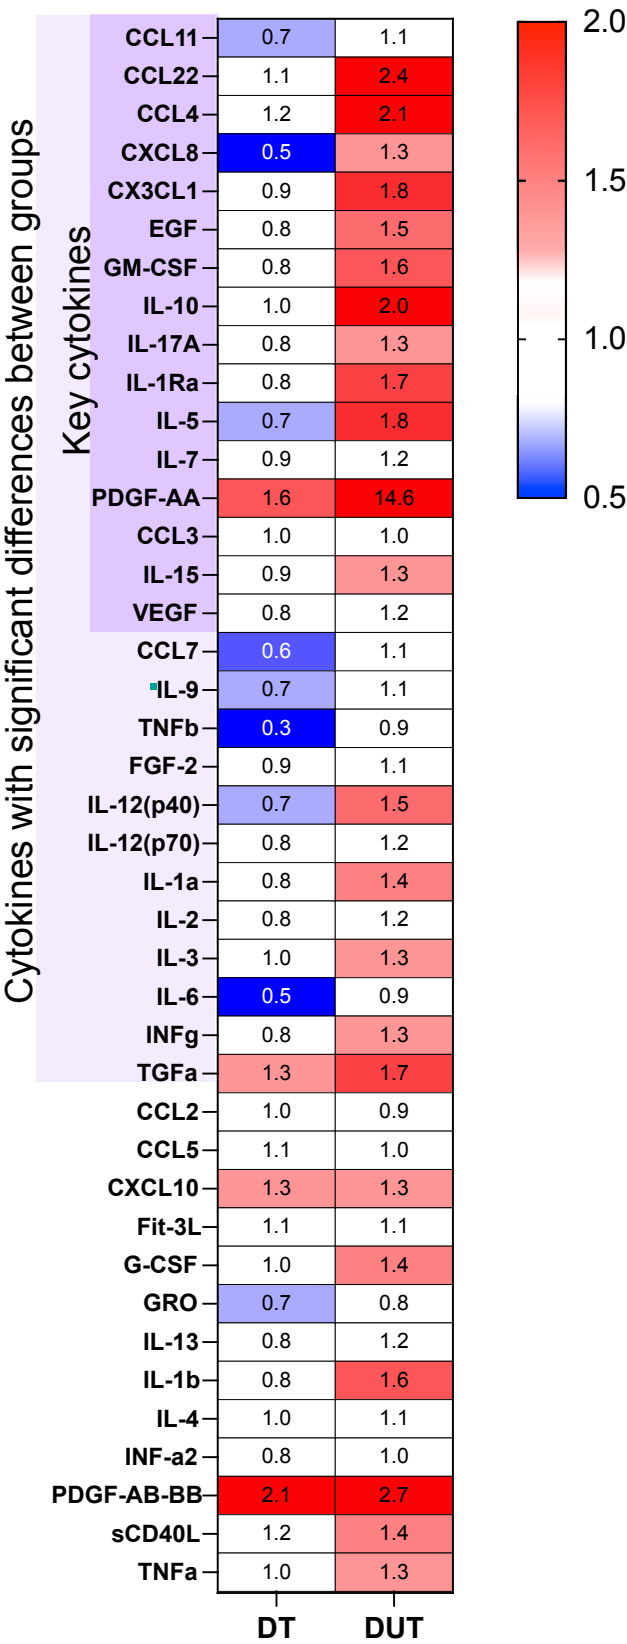

**Figure S1.** Serum Bet v 1-specific IgG<sub>4</sub> levels for the DT, DUT and HS groups, measured by ELISA. IgG<sub>4</sub> level is shown as a relative units (RU) against a standard serum.

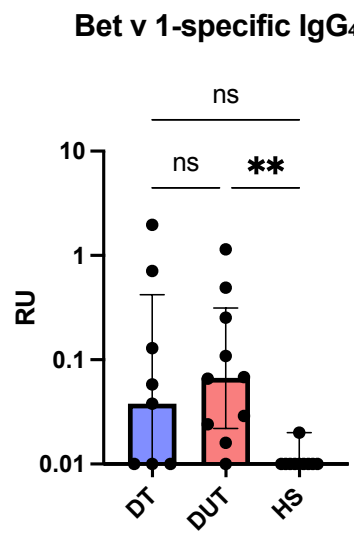

**Figure S2.** Evaluation of the levels of multiple cytokines with the difference between DT, DUT and HS groups.

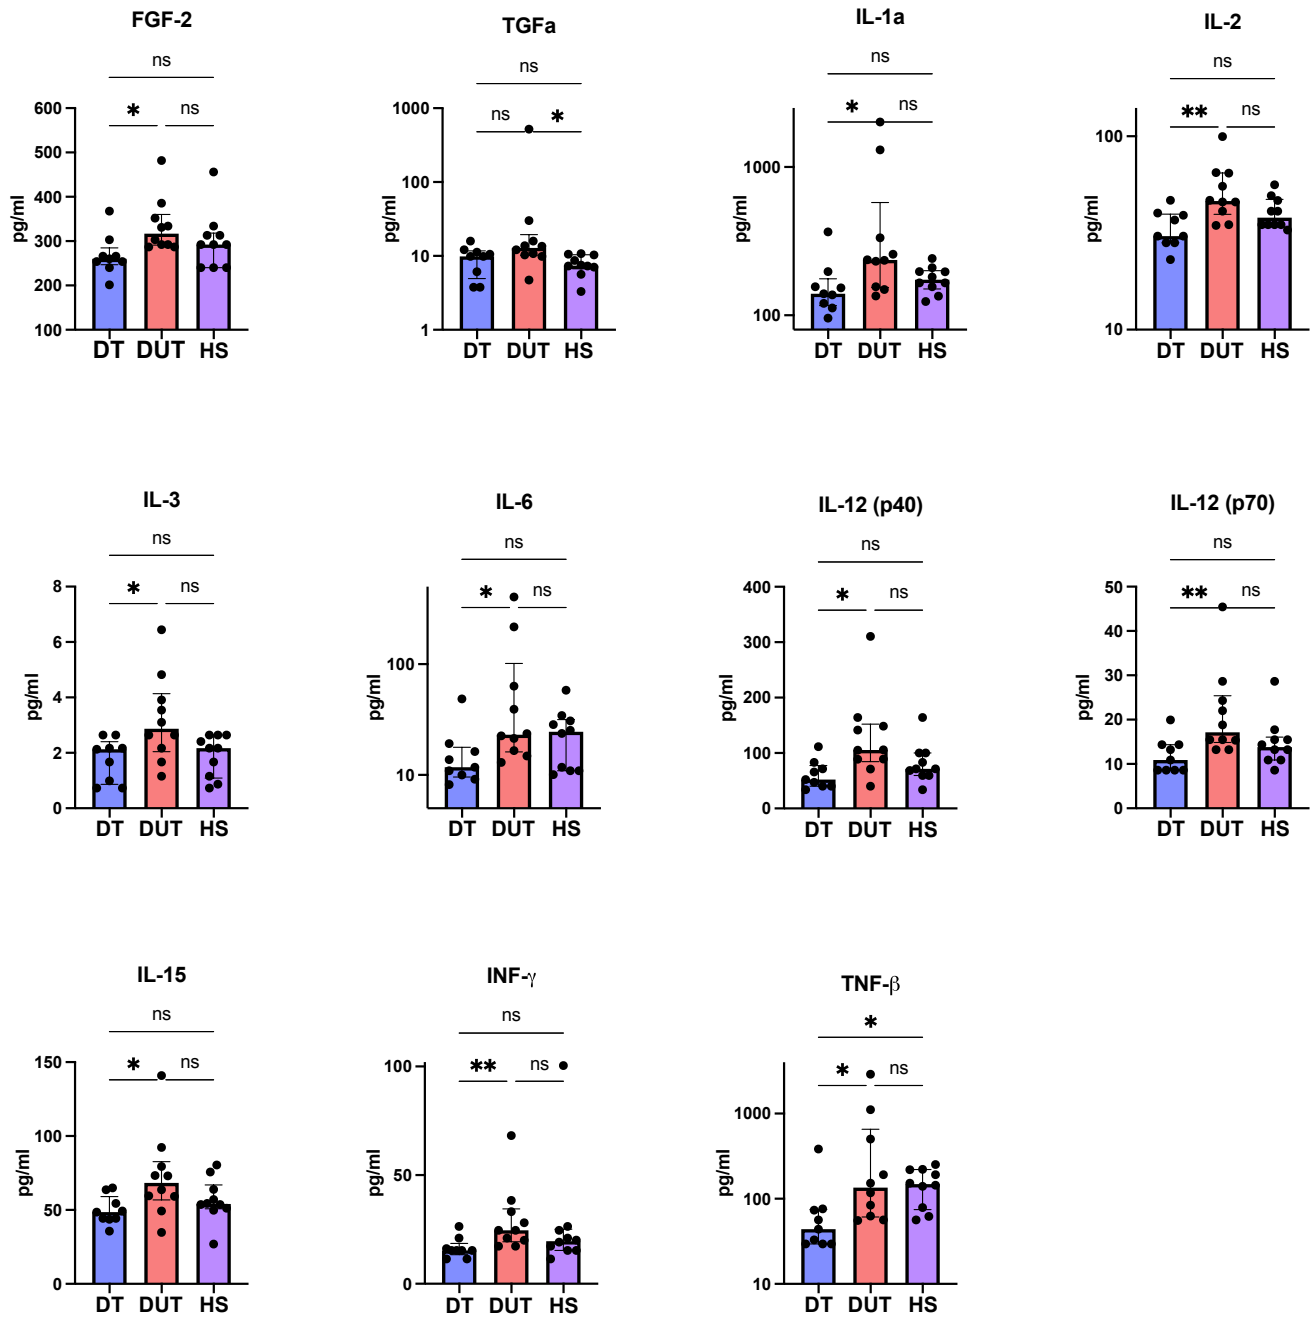

**Figure S3.** Evaluation of the levels of cytokines that do not contribute in differentiating the DT, DUT and HS groups.

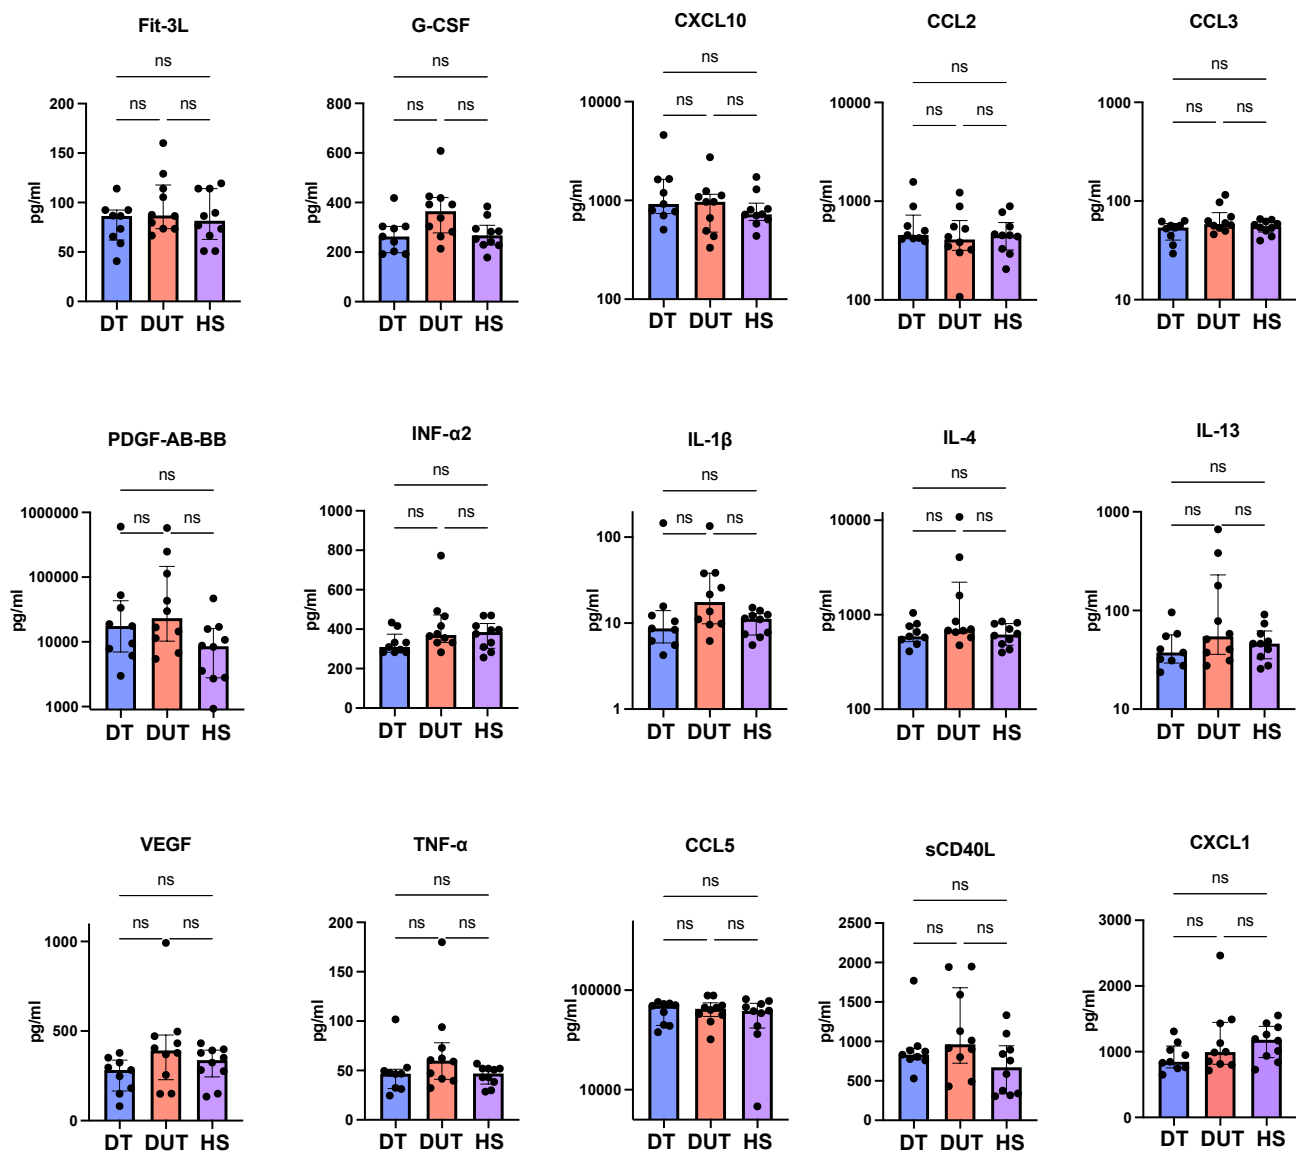

Supplement: Supplementary file 2 [file supplementary]
